# Supplementary material
Source: PubMed Central journal article supplement (PMC2254521)

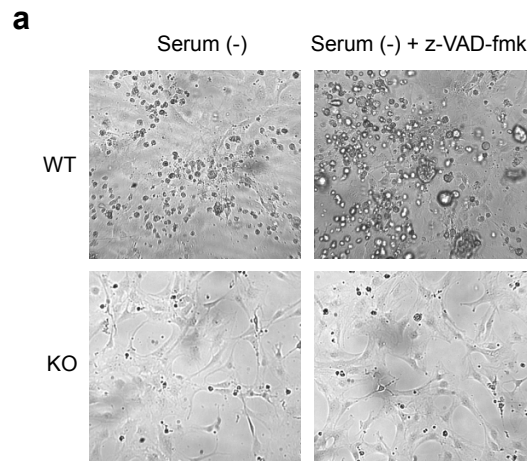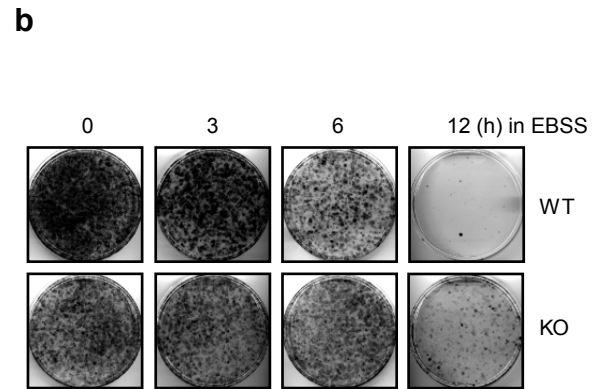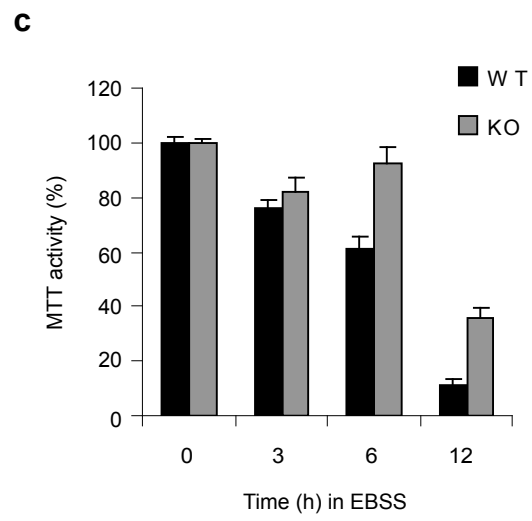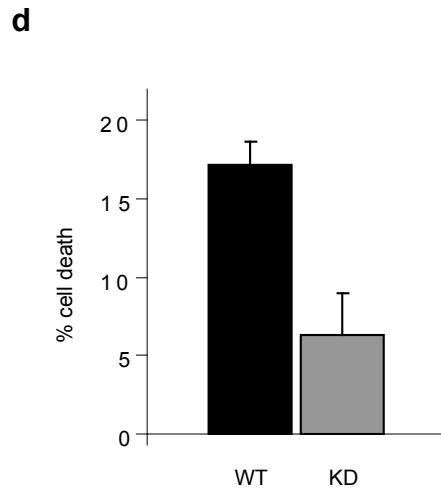

Supplement: NIHMS40063-supplement-Fig__S1.pdf [file NIHMS40063-supplement-Fig__S1.pdf]

**a**

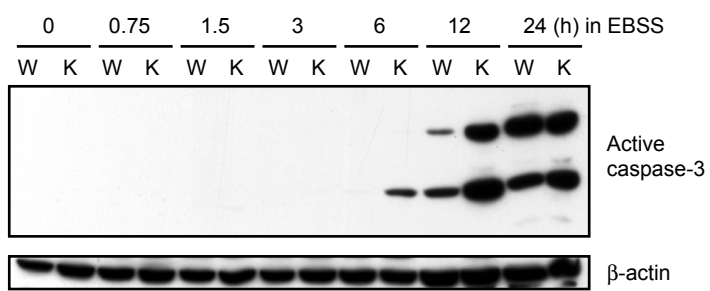

**b**

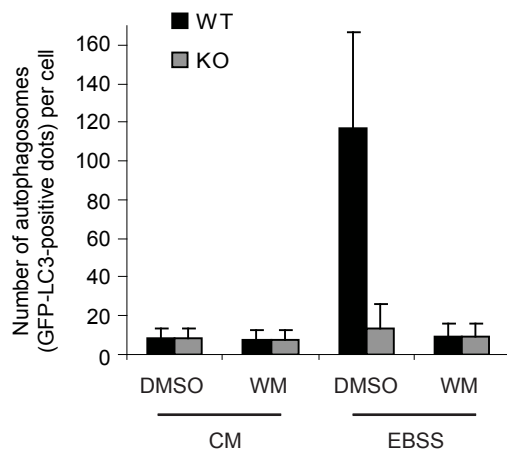

Supplement: NIHMS40063-supplement-Fig__S2.pdf [file NIHMS40063-supplement-Fig__S2.pdf]

GFP-LC3

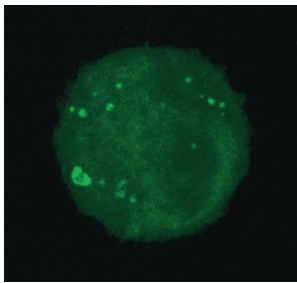

Bif-1-HcRed

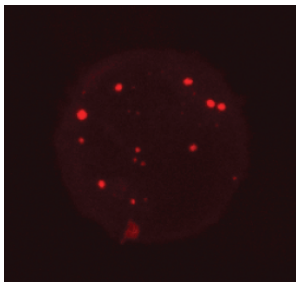

Overlay

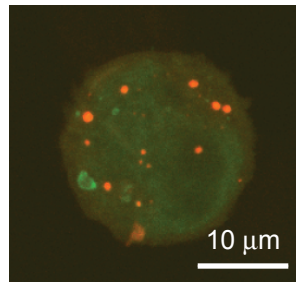

Supplement: NIHMS40063-supplement-Fig__S3.pdf [file NIHMS40063-supplement-Fig__S3.pdf]

**a**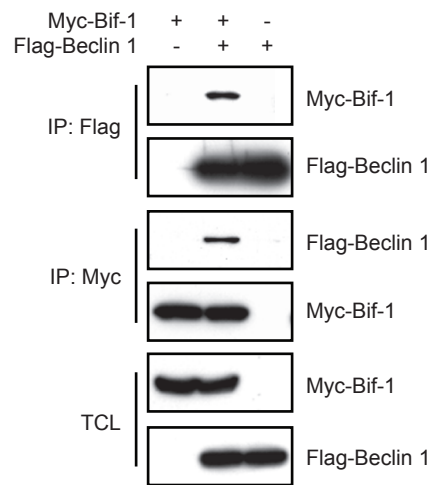**b**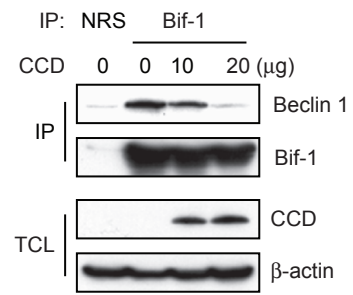

Supplement: NIHMS40063-supplement-Fig__S4.pdf [file NIHMS40063-supplement-Fig__S4.pdf]
